# Supplementary material for: Comparative genomics of Burkholderia multivorans, a ubiquitous pathogen with a highly conserved genomic structure
Source: PubMed Central journal article supplement (PMC5400248; doi:10.1371/journal.pone.0176191), 2017-04-21
Supplement: pone.0176191.s001.pdf [file pone.0176191.s001.pdf]

**S1 Table. The frequency of orthologous versus non-orthologous CDS varies among isolates.** Pearson chi-square analysis testing the independence of gene conservation (orthologous vs. non-orthologous CDS) and isolate ( $X^2(8)=1829.6$ ,  $p<0.001$ ). Each cell in the contingency represents the observed frequency and standardized residual (in between brackets) and is preceded by + or - if the standardized residual is  $>1.96$  or  $<-1.96$ , respectively, and significant at  $p<0.05$ .

| Isolate    |   | Orthologous CDS |   | Non-orthologous CDS |
|------------|---|-----------------|---|---------------------|
| ST180-ENV  |   | 5271 (-0.397)   |   | 523 (1.301)         |
| ST180-CF   | + | 5266 (2.643)    | - | 285 (-8.658)        |
| ST189-ENV  | + | 5144 (2.025)    | - | 323 (-6.632)        |
| ST189-CF   | + | 5132 (2.540)    | - | 283 (-8.319)        |
| ST287-ENV  | + | 5494 (2.589)    | - | 306 (-8.480)        |
| ST287-CF   |   | 5505 (-1.668)   | + | 650 (5.462)         |
| ST650-ENV  | + | 5275 (2.209)    | - | 319 (-7.235)        |
| ST650-CF   |   | 5250 (1.795)    | - | 349 (-5.879)        |
| ATCC 17616 | - | 4893 (-10.988)  | + | 1365 (35.988)       |
