# Supplementary material for: Comparative genomics of Burkholderia multivorans, a ubiquitous pathogen with a highly conserved genomic structure
Source: PubMed Central journal article supplement (PMC5400248; doi:10.1371/journal.pone.0176191), 2017-04-21
Supplement: pone.0176191.s002.pdf [file pone.0176191.s002.pdf]

**S2 Table. The frequency of orthologous versus non-orthologous CDS varies among STs.** Pearson chi-square analysis testing the independence of gene conservation (orthologous vs. non-orthologous CDS) and ST ( $X^2(3)=67.3$ ,  $p<0.001$ ). Each cell in the contingency represents the observed frequency and standardized residual (in between brackets) and is preceded by + or - if the standardized residual is  $>1.96$  or  $<-1.96$ , respectively, and significant at  $p<0.05$ .

| <b>ST</b> | <b>Orthologous CDS</b> | <b>Non-orthologous CDS</b> |
|-----------|------------------------|----------------------------|
| ST180     | 10537 (-0.471)         | 808 (1.757)                |
| ST189     | 10276 (1.217)          | - 606 (-4.541)             |
| ST287     | 10999 (-1.473)         | + 956 (5.499)              |
| ST650     | 10525 (0.797)          | - 668 (-2.974)             |
