# Supplementary material for: Comparative genomics of Burkholderia multivorans, a ubiquitous pathogen with a highly conserved genomic structure
Source: PubMed Central journal article supplement (PMC5400248; doi:10.1371/journal.pone.0176191), 2017-04-21
Supplement: pone.0176191.s003.pdf [file pone.0176191.s003.pdf]

**S3 Table.** *B. cenocepacia* genomes included in the present study. CF, cystic fibrosis; ENV, environmental.

| Isolate      | Genomovar | Project    | Isolation source | Size (bp) | CDS   |
|--------------|-----------|------------|------------------|-----------|-------|
| J2315        | IIIA      | PRJNA339   | CF               | 8,055,782 | 7,116 |
| H111         | IIIA      | PRJNA69823 | CF               | 7,714,893 | 6,932 |
| K56-2Valvano | IIIA      | PRJNA62783 | CF               | 7,750,255 | 6,793 |
| AU1054       | IIIB      | PRJNA13919 | CF               | 7,279,116 | 6,477 |
| HI2424       | IIIB      | PRJNA13918 | ENV              | 7,702,840 | 6,919 |
| MC0-3        | IIIB      | PRJNA17929 | ENV              | 7,971,389 | 7,008 |
