# Supplementary material for: Comparative genomics of Burkholderia multivorans, a ubiquitous pathogen with a highly conserved genomic structure
Source: PubMed Central journal article supplement (PMC5400248; doi:10.1371/journal.pone.0176191), 2017-04-21
Supplement: pone.0176191.s004.pdf [file pone.0176191.s004.pdf]

**S4 Table. *B. cenocepacia*-specific COGs.** COG categories: J, translation, ribosomal structure and biogenesis; K, transcription; L, replication, recombination and repair; B, chromatin structure and dynamics; D, cell cycle control, cell division, chromosome partitioning; V, defense mechanisms; T, signal transduction mechanisms; M, cell wall/membrane/envelope biogenesis; N, cell motility; W, extracellular structures; U, intracellular trafficking, secretion, and vesicular transport; O, posttranslational modification, protein turnover, chaperones; X, mobilome: prophages, transposons; C, energy production and conversion; G, carbohydrate transport and metabolism; E, amino acid transport and metabolism; F, nucleotide transport and metabolism; H, coenzyme transport and metabolism; I, lipid transport and metabolism; P, inorganic ion transport and metabolism; Q, secondary metabolites biosynthesis, transport and catabolism; R, general function prediction only; S, function unknown.

| COG     | COG name                                                                            | COG category |
|---------|-------------------------------------------------------------------------------------|--------------|
| COG0063 | NAD(P)H-hydrate repair enzyme Nnr, NAD(P)H-hydrate dehydratase domain               | F            |
| COG0213 | Thymidine phosphorylase                                                             | F            |
| COG0274 | Deoxyribose-phosphate aldolase                                                      | F            |
| COG0295 | Cytidine deaminase                                                                  | F            |
| COG0520 | Selenocysteine lyase/Cysteine desulfurase                                           | E            |
| COG0530 | Ca <sup>2+</sup> /Na <sup>+</sup> antiporter                                        | P            |
| COG0569 | Trk K <sup>+</sup> transport system, NAD-binding component                          | P            |
| COG0639 | Diadenosine tetraphosphatase ApaH/serine/threonine protein phosphatase, PP2A family | T            |
| COG0738 | Fucose permease                                                                     | G            |
| COG1027 | Aspartate ammonia-lyase                                                             | E            |
| COG1056 | Nicotinamide mononucleotide adenylyltransferase                                     | H            |
| COG1090 | NAD dependent epimerase/dehydratase family enzyme                                   | R            |
| COG1169 | Isochorismate synthase EntC                                                         | HQ           |
| COG1368 | Phosphoglycerol transferase MdoB or a related enzyme of AlkP superfamily            | M            |
| COG1501 | Alpha-glucosidase, glycosyl hydrolase family GH31                                   | G            |
| COG1510 | DNA-binding transcriptional regulator GbsR, MarR family                             | K            |
| COG1513 | Cyanate lyase                                                                       | P            |
| COG1586 | S-adenosylmethionine decarboxylase or arginine decarboxylase                        | E            |
| COG1621 | Sucrose-6-phosphate hydrolase SacC, GH32 family                                     | G            |
| COG1647 | Esterase/lipase                                                                     | Q            |
| COG1708 | Predicted nucleotidyltransferase                                                    | R            |
| COG1944 | Ribosomal protein S12 methylthiotransferase accessory factor YcaO                   | J            |
| COG1957 | Inosine-uridine nucleoside N-ribohydrolase                                          | F            |
| COG1972 | Nucleoside permease NupC                                                            | F            |
| COG2116 | Formate/nitrite transporter FocA, FNT family                                        | P            |
| COG2140 | Oxalate decarboxylase/archaeal phosphoglucose isomerase, cupin superfamily          | G            |
| COG2206 | HD-GYP domain, c-di-GMP phosphodiesterase class II (or its inactivated variant)     | T            |

Continued on next page

Continued from previous page

| <b>COG</b> | <b>COG name</b>                                                                                                     | <b>COG category</b> |
|------------|---------------------------------------------------------------------------------------------------------------------|---------------------|
| COG2234    | Zn-dependent amino- or carboxypeptidase, M28 family                                                                 | O                   |
| COG2258    | Uncharacterized conserved protein YiiM, contains MOSC domain                                                        | S                   |
| COG2509    | Uncharacterized FAD-dependent dehydrogenase                                                                         | R                   |
| COG2602    | Beta-lactamase class D                                                                                              | V                   |
| COG2936    | Predicted acyl esterase                                                                                             | R                   |
| COG2974    | DNA recombination-dependent growth factor C                                                                         | L                   |
| COG3011    | Predicted thiol-disulfide oxidoreductase YuxK, DCC family                                                           | R                   |
| COG3147    | Cell division protein DedD (periplasmic protein involved in septation)                                              | D                   |
| COG3177    | Fic family protein                                                                                                  | K                   |
| COG3208    | Surfactin synthase thioesterase subunit                                                                             | Q                   |
| COG3227    | Zn-dependent metalloprotease                                                                                        | O                   |
| COG3238    | Uncharacterized membrane protein YdcZ, DUF606 family                                                                | S                   |
| COG3300    | MHYT domain, NO-binding membrane sensor                                                                             | T                   |
| COG3393    | Predicted acetyltransferase, GNAT family                                                                            | R                   |
| COG3422    | Uncharacterized conserved protein YegP, UPF0339 family                                                              | S                   |
| COG3437    | Response regulator c-di-GMP phosphodiesterase, RpfG family, contains REC and HD-GYP domains                         | T                   |
| COG3467    | Nitroimidazol reductase NimA or a related FMN-containing flavoprotein, pyridoxamine 5-phosphate oxidase superfamily | V                   |
| COG3510    | Cephalosporin hydroxylase                                                                                           | V                   |
| COG3525    | N-acetyl-beta-hexosaminidase                                                                                        | G                   |
| COG3530    | Uncharacterized conserved protein, DUF3820 family                                                                   | S                   |
| COG3537    | Putative alpha-1,2-mannosidase                                                                                      | G                   |
| COG3602    | Uncharacterized protein                                                                                             | S                   |
| COG3637    | Opacity protein and related surface antigens                                                                        | M                   |
| COG3670    | Carotenoid cleavage dioxygenase or a related enzyme                                                                 | Q                   |
| COG3766    | Uncharacterized membrane protein YjfL, UPF0719 family                                                               | S                   |
| COG3963    | Phospholipid N-methyltransferase                                                                                    | I                   |
| COG3979    | Chitodextrinase                                                                                                     | G                   |
| COG4117    | Thiosulfate reductase cytochrome b subunit                                                                          | P                   |
| COG4260    | Membrane protease subunit, stomatin/prohibitin family, contains C-terminal Zn-ribbon domain                         | O                   |
| COG4262    | Predicted spermidine synthase with an N-terminal membrane domain                                                    | R                   |
| COG4285    | Uncharacterized conserved protein , contains N-terminal glutamine amidotransferase (GATase1)-like domain            | R                   |
| COG4448    | L-asparaginase II                                                                                                   | E                   |
| COG4452    | Inner membrane protein involved in colicin E2 resistance                                                            | V                   |
| COG4551    | Predicted protein tyrosine phosphatase                                                                              | R                   |
| COG4589    | Predicted CDP-diglyceride synthetase/phosphatidate cytidylyltransferase                                             | R                   |
| COG4682    | Uncharacterized membrane protein YiaA                                                                               | S                   |
| COG4693    | Oxidoreductase (NAD-binding), involved in siderophore biosynthesis                                                  | P                   |

Continued on next page

Continued from previous page

| <b>COG</b> | <b>COG name</b>                                                          | <b>COG category</b> |
|------------|--------------------------------------------------------------------------|---------------------|
| COG4773    | Outer membrane receptor for ferric coprogen and ferric-rhodotorulic acid | P                   |
| COG4922    | Predicted SnoaL-like aldol condensation-catalyzing enzyme                | R                   |
| COG5002    | Signal transduction histidine kinase                                     | T                   |
| COG5460    | Uncharacterized conserved protein, DUF2164 family                        | S                   |
| COG5472    | Predicted small integral membrane protein                                | S                   |
| COG5500    | Uncharacterized membrane protein                                         | S                   |
| COG5528    | Uncharacterized membrane protein                                         | S                   |
| COG5612    | Uncharacterized membrane protein                                         | S                   |
