# Supplementary material for: Comparative genomics of Burkholderia multivorans, a ubiquitous pathogen with a highly conserved genomic structure
Source: PubMed Central journal article supplement (PMC5400248; doi:10.1371/journal.pone.0176191), 2017-04-21

**S1 Fig. Parsimony tree showing the relatedness of the genomes in terms of gene content.** Scale bar represents number of changes of state required in each character. The tree was rooted on the branch with the largest branch length.

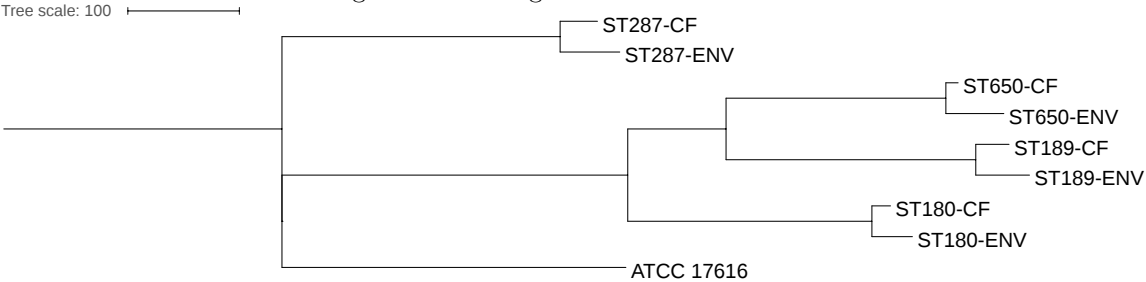

Supplement: pone.0176191.s007.pdf [file pone.0176191.s007.pdf]
